# Supplementary material for: Seroprevalence of Measles-Specific IgM and IgG Antibodies Among Children Aged 0-12 Years in Northeast Nigeria
Source: Research Square preprint supplement (doi:10.21203/rs.3.rs-7676445/v1), 2025-11-19
Supplement: Supplementary file 1 [file e2ef5df83e899653ca3761d7.pdf]

## QUESTIONNAIRE

My name is Umar Abdullahi, a postgraduate student of the department of microbiology, Ahmadu Bello University, Zaria. I am carrying out my Ph.D. research on “Seroprevalence and Molecular Characterization of Measles virus among Children (0-12 years) in Parts of Northeastern Nigeria.

I will appreciate your contribution to the success of this research by filling this questionnaire.

1. The educational level of parent:

None [   ], Primary [   ], Secondary [   ], Tertiary [   ],

2. Socio- economic status: High [   ], Medium [   ], Low [   ]

3. Name of child .....

4. Sex of child: Male [   ], Female [   ]

5. Age of your child .....

6. Place of birth .....

7. Nutritional status of your child: Normal [   ], Average [   ], Poor [   ]

8. Did your child receive vitamin A supplement? Yes [   ], No [   ]

9. Any previous vaccination given to your child? Yes [   ], No [   ]

10. Any recent case of measles infection in your family? Yes [   ], No [   ]

11. Has your child ever been hospitalized for febrile illness involving rash? Yes [   ], No [   ]

12. Which of the following vaccines has your child received?

Measles-mumps-rubella [   ], Polio Vaccine [   ], Chicken pox vaccine [   ]
